# Supplementary material for: BRCA1 deficiency in mature CD8+ T lymphocytes impairs antitumor immunity
Source: PubMed Central journal article supplement — J Immunother Cancer. 2023 Feb 2;11(2):e005852. doi: 10.1136/jitc-2022-005852 (PMC9896206; doi:10.1136/jitc-2022-005852), 2023-02-02
Supplement: jitc-2022-005852supp001.pdf [file jitc-2022-005852supp001.pdf]

## Supplemental Figure 1. Association between BRCA1 and T cells

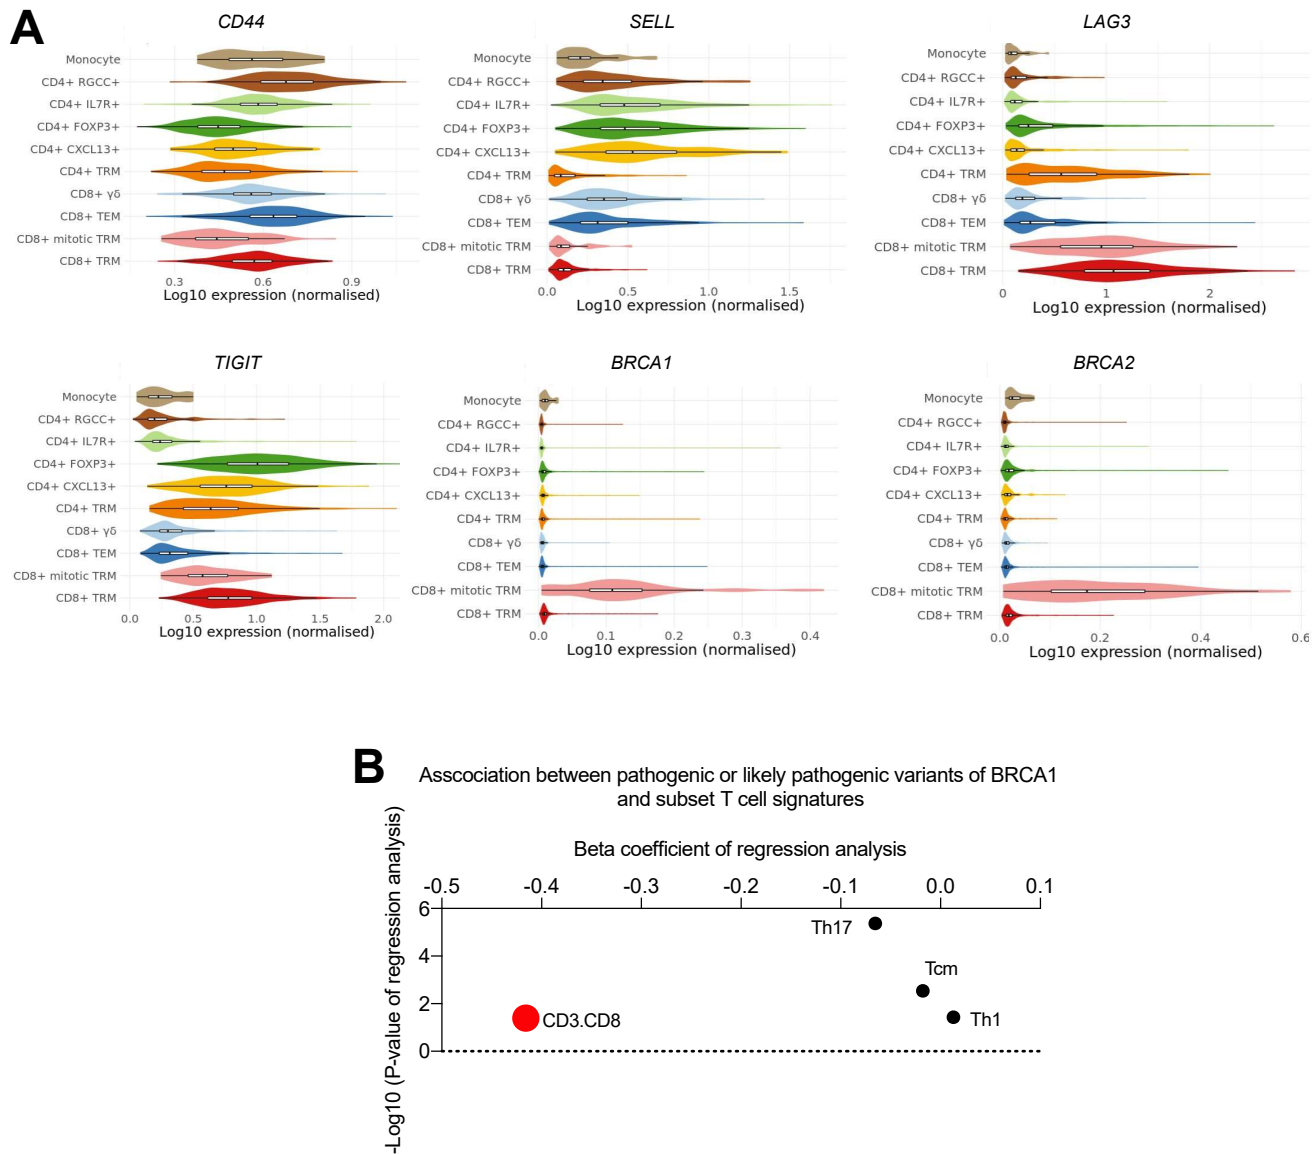

**Supplemental Figure 1. Association between BRCA1 and T cells.** (A) Violin plots for various T cell markers, *BRCA1*, and *BRCA2* expression in different immune subsets<sup>9</sup>; TRM: tissue resident memory. (B) Association between pathogenic (or likely pathogenic) variants of *BRCA1* and subset T cell signatures<sup>10</sup>.
