# Supplementary material for: BRCA1 deficiency in mature CD8+ T lymphocytes impairs antitumor immunity
Source: PubMed Central journal article supplement — J Immunother Cancer. 2023 Feb 2;11(2):e005852. doi: 10.1136/jitc-2022-005852 (PMC9896206; doi:10.1136/jitc-2022-005852), 2023-02-02
Supplement: jitc-2022-005852supp002.pdf [file jitc-2022-005852supp002.pdf]

Supplemental Figure 2. BRCA1 mRNA and protein levels in naïve and activated CD8<sup>+</sup> T cells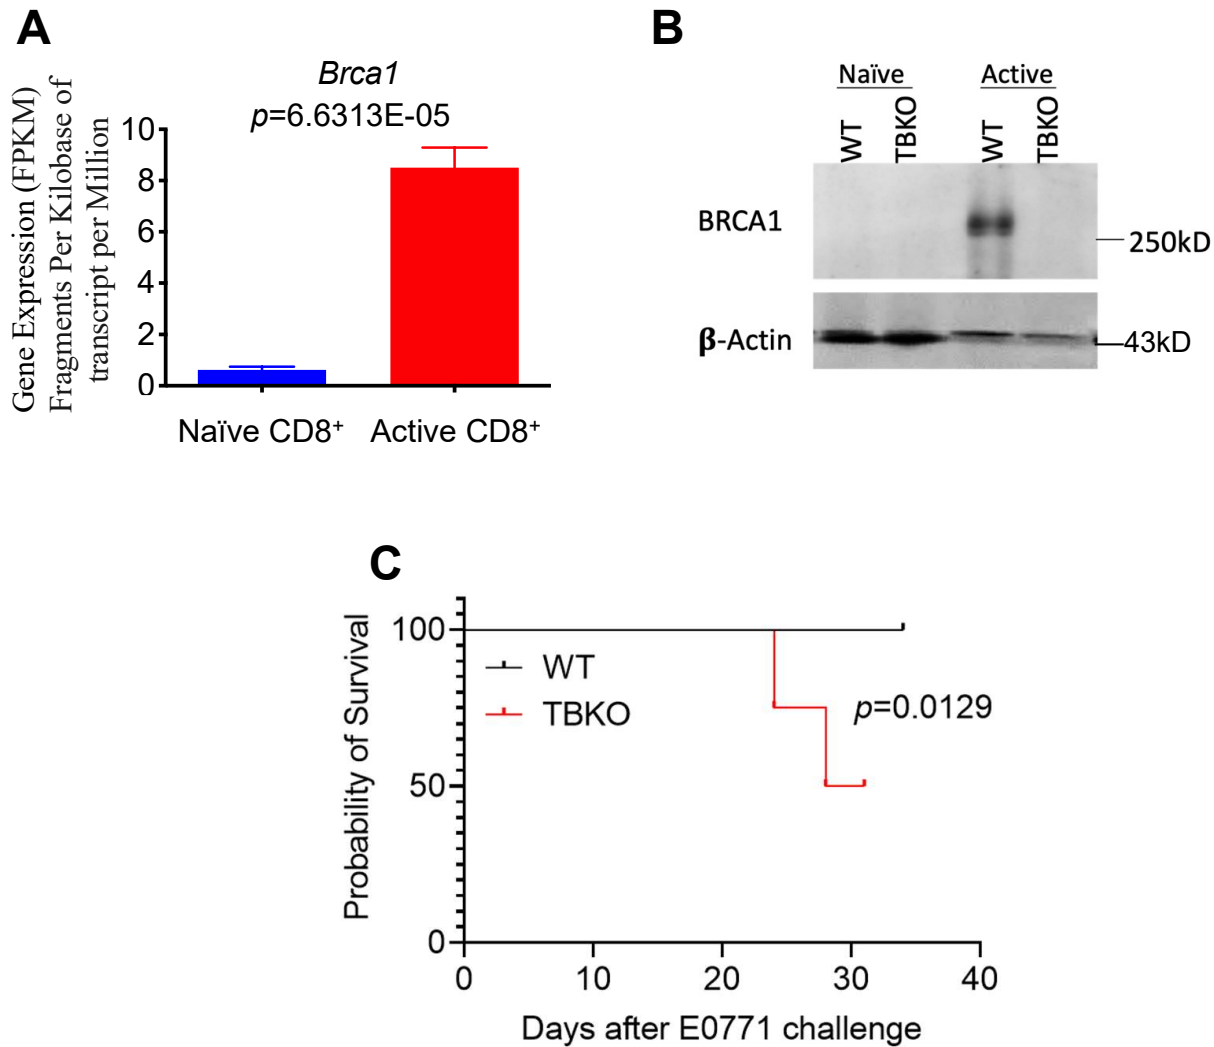

**Supplemental Figure 2. BRCA1 mRNA and protein levels in naïve and activated CD8<sup>+</sup> T cells.** (A) *Brca1* quantification through RNA-sequencing in naïve and activated CD8<sup>+</sup> mouse T cells; data were extracted from PMID: 30487606<sup>11</sup>. (B) BRCA1 western blot in WT and TBKO CD8<sup>+</sup> cells before and after *in vitro* activation. (C) WT and TBKO mice survival curves after E0771 tumor challenge.
