# Supplementary material for: BRCA1 deficiency in mature CD8+ T lymphocytes impairs antitumor immunity
Source: PubMed Central journal article supplement — J Immunother Cancer. 2023 Feb 2;11(2):e005852. doi: 10.1136/jitc-2022-005852 (PMC9896206; doi:10.1136/jitc-2022-005852), 2023-02-02
Supplement: jitc-2022-005852supp003.pdf [file jitc-2022-005852supp003.pdf]

## Supplemental Figure 3. Flow cytometry of splenocytes from WT and TBKO mice

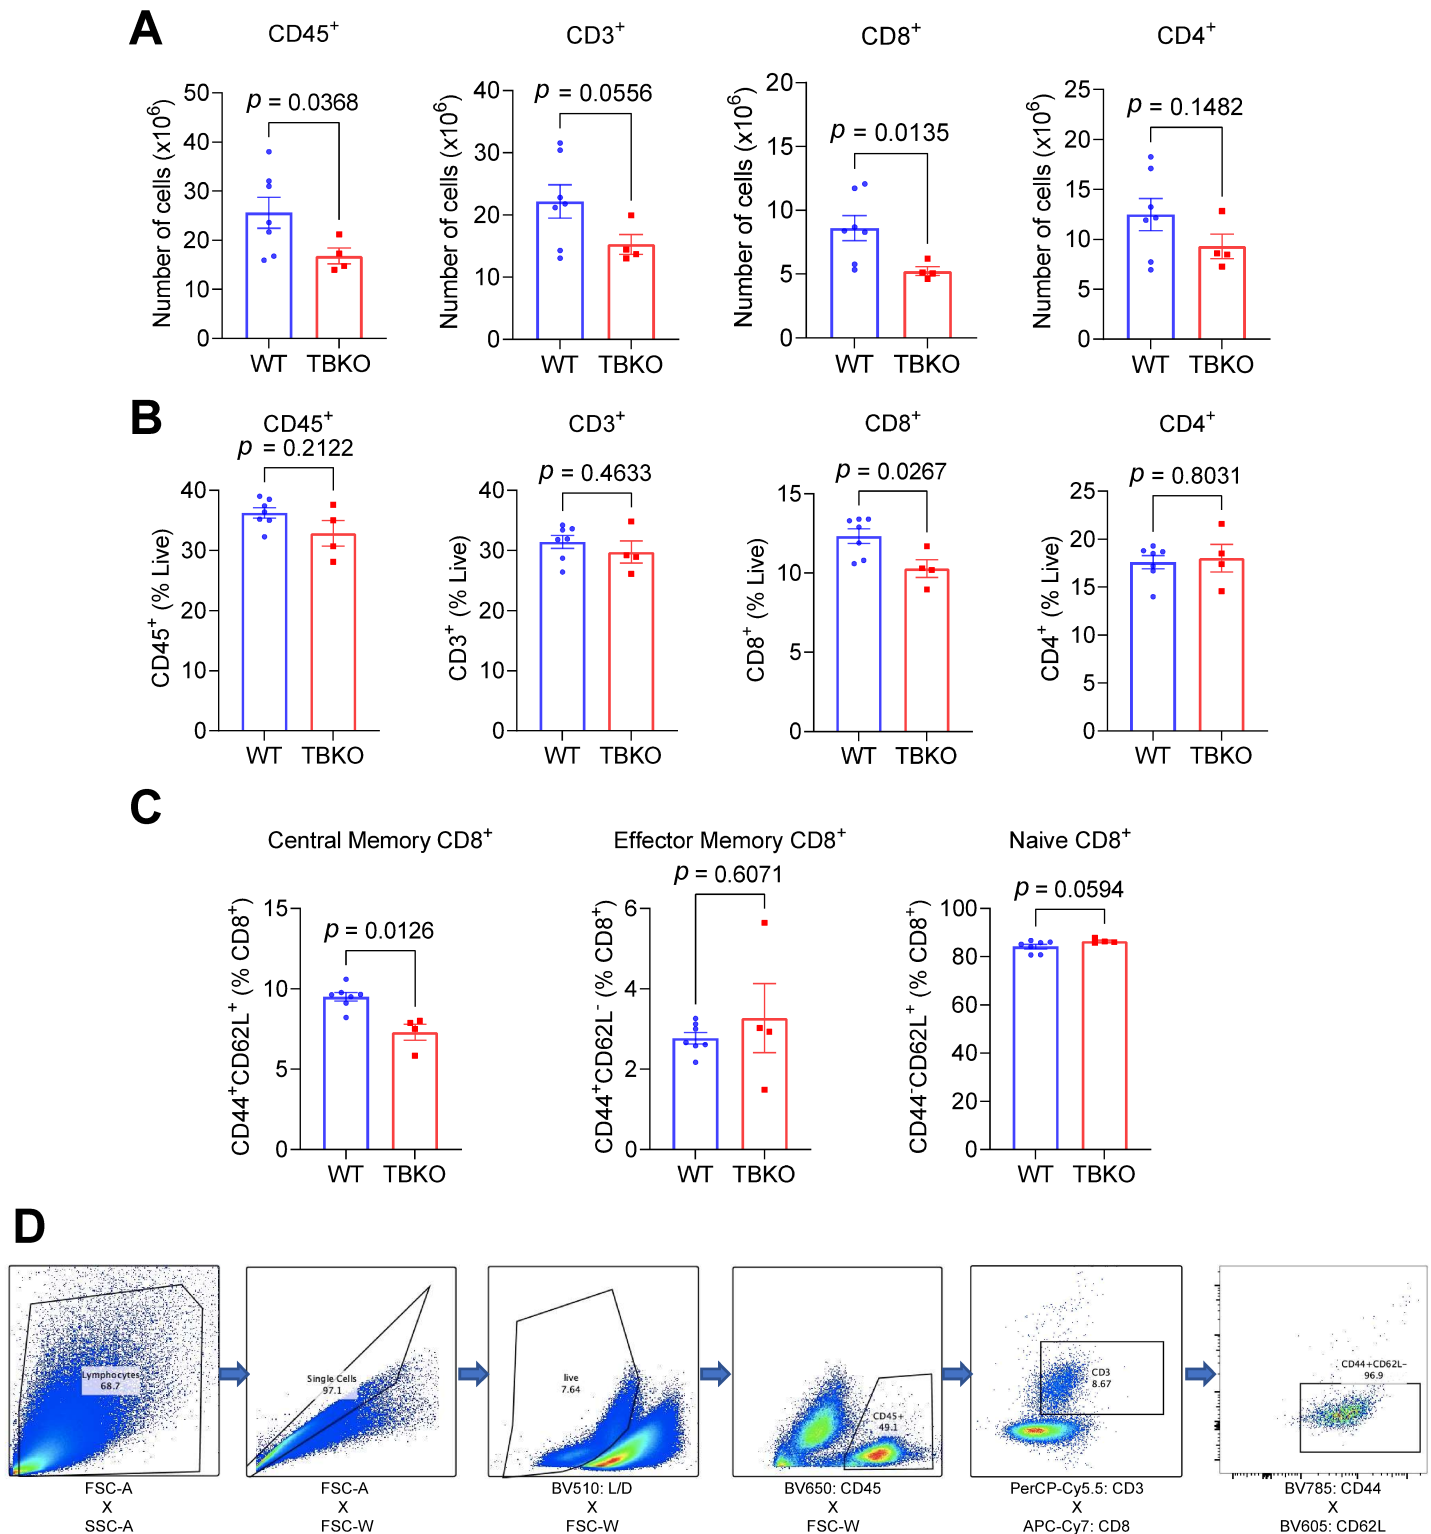

**Supplemental Figure 3. Flow cytometry of splenocytes from WT and TBKO mice. (A-C)** Flow cytometry analysis of tumor free WT and TBKO mice splenocytes: numbers of major immune subsets (A), percentages of major immune subsets (B), percentages of subset CD8<sup>+</sup> cells (C). WT group comprises three dLck-Cre, *Brcal*<sup>+/+</sup> mice and four *Brcal*<sup>fl/fl</sup> mice at similar age. **(D)** Representative flow gating strategy for TILs flow analysis.
