# Supplementary material for: BRCA1 deficiency in mature CD8+ T lymphocytes impairs antitumor immunity
Source: PubMed Central journal article supplement — J Immunother Cancer. 2023 Feb 2;11(2):e005852. doi: 10.1136/jitc-2022-005852 (PMC9896206; doi:10.1136/jitc-2022-005852), 2023-02-02
Supplement: jitc-2022-005852supp004.pdf [file jitc-2022-005852supp004.pdf]

## Supplemental Figure 4. BRCA1 status correlates with DNA replication, DNA repair and apoptosis

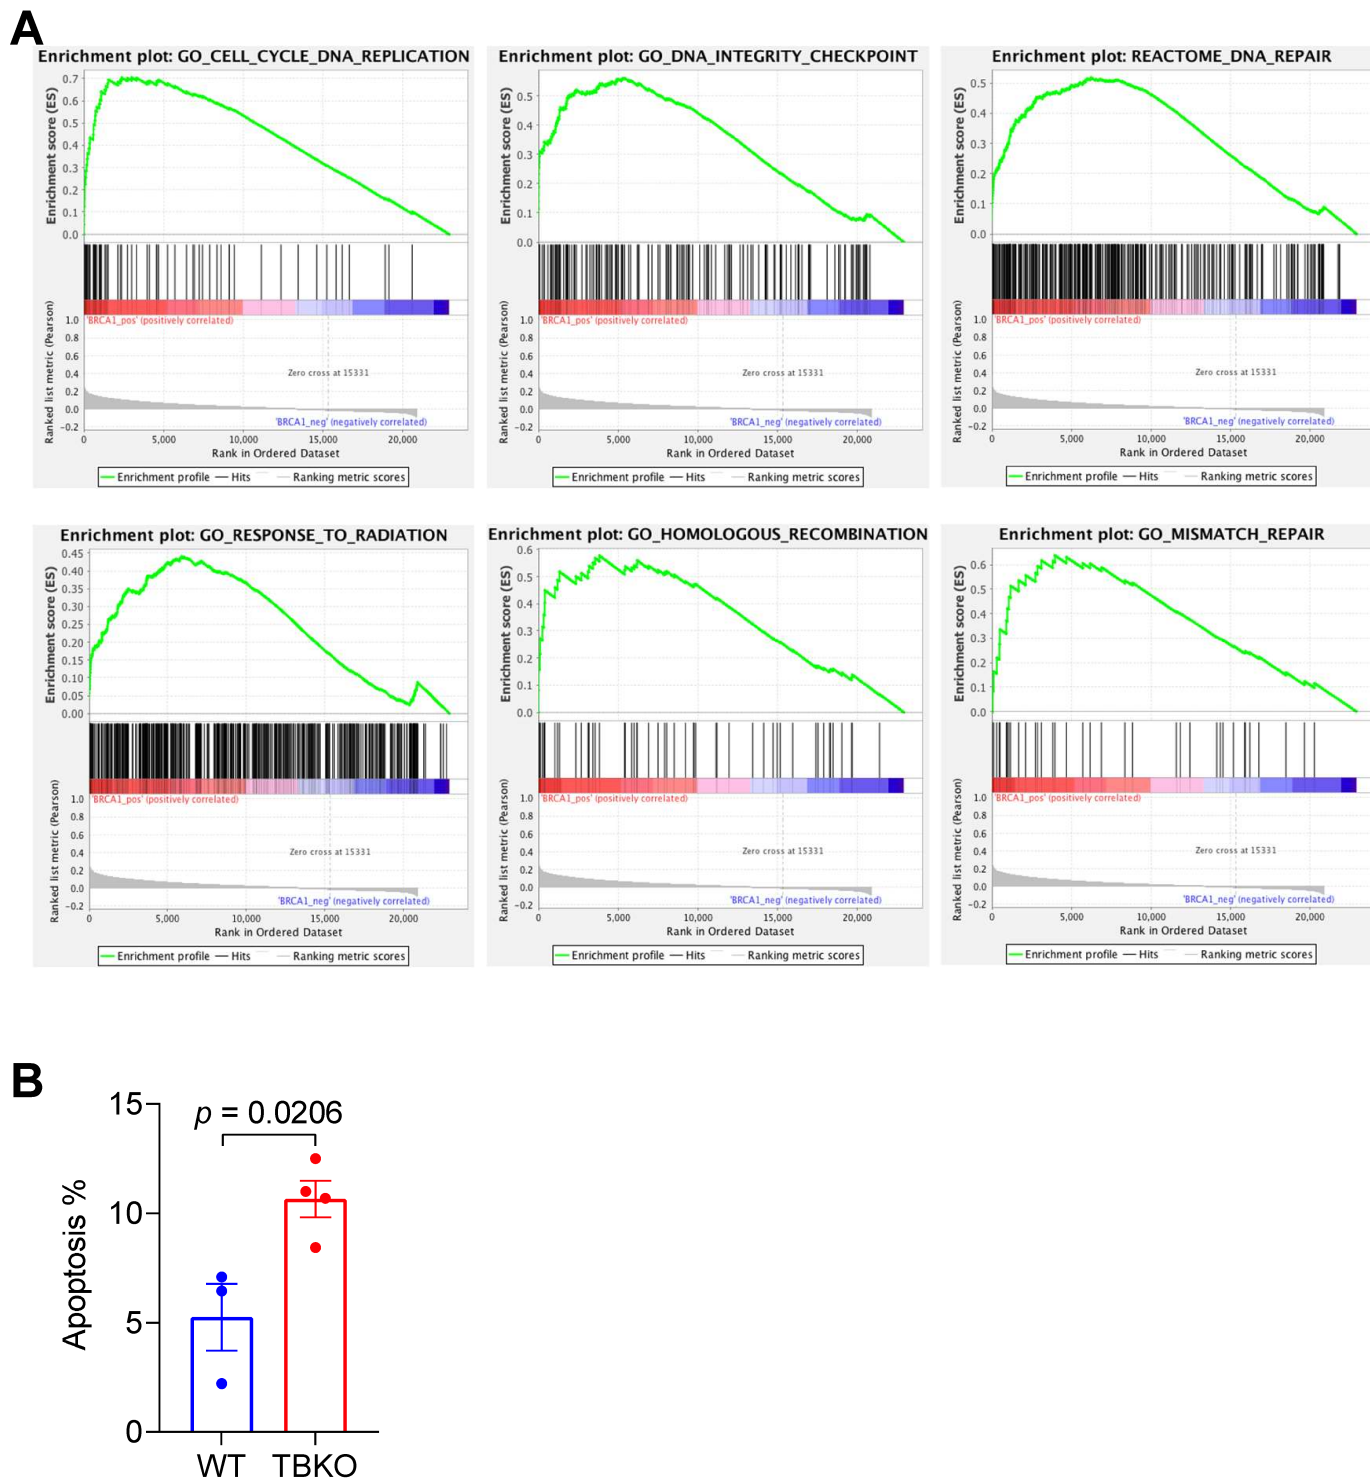

**Supplemental Figure 4. BRCA1 status correlates with DNA replication, DNA repair and apoptosis. (A)** BRCA1 mRNA abundance correlates with cell cycle- and DNA repair-related pathways in human melanoma TILs. **(B)** Total apoptosis percentage of WT and TBKO CD8<sup>+</sup> after *in vitro* anti-CD3/CD28 activation.
