# Supplementary material for: BRCA1 deficiency in mature CD8+ T lymphocytes impairs antitumor immunity
Source: PubMed Central journal article supplement — J Immunother Cancer. 2023 Feb 2;11(2):e005852. doi: 10.1136/jitc-2022-005852 (PMC9896206; doi:10.1136/jitc-2022-005852), 2023-02-02
Supplement: jitc-2022-005852supp005.pdf [file jitc-2022-005852supp005.pdf]

**Supplemental Table 1 Mutation information for individual donors.**

| SUBJECT ID | <i>BRCA1</i> MUTATION STATUS | MUTATION                     |
|------------|------------------------------|------------------------------|
| LB001      | POSITIVE                     | c.5266dupC                   |
| LB002      | POSITIVE                     | c.68_69del (p.Glu23Valfs*17) |
| LB003      | NEGATIVE                     | NOT DETECTED                 |
| LB004      | NEGATIVE                     | NOT DETECTED                 |
| LB005      | POSITIVE                     | c.514del                     |
| LB006      | POSITIVE                     | c.5266dup                    |
| LB007      | POSITIVE                     | c.134+5G>A (Intronic)        |
| LB008      | POSITIVE                     | c.181T>G                     |
| LB009      | NEGATIVE                     | NOT DETECTED                 |
| LB010      | POSITIVE                     | c.68_69del                   |
| LB012      | NEGATIVE                     | NOT DETECTED                 |
| LB014      | NEGATIVE                     | NOT DETECTED                 |
| LB015      | NEGATIVE                     | NOT DETECTED                 |
| LB016      | NEGATIVE                     | NOT DETECTED                 |
| LB017      | POSITIVE                     | c.4357+1G>A (splice donor)   |
| LB018      | POSITIVE                     | c.1100delC                   |
| LB021      | NEGATIVE                     | NOT DETECTED                 |
